# Supplementary material
Source: PubMed Central journal article supplement (PMC4064434)

# Cytosolic Ca<sup>2+</sup> prevents the subplasmalemmal clustering of STIM1: an intrinsic mechanism to avoid Ca<sup>2+</sup> overload

## JCS034496 Supplementary Material

### Files in this Data Supplement:

- [Supplemental Figure S1](#) -

**Fig. S1.** Comparison on the kinetics of STIM1 oligomerization and clustering in the superficial (ROI 1) and deeper ER (ROI 2) domains upon store depletion with histamine/BHQ (100 and 15  $\mu\text{M}$ ). (A) Images illustrate the location of the two regions of interest (ROI) measured. (B) Representative tracings of the effect of 100  $\mu\text{M}$  histamine and 15  $\mu\text{M}$  BHQ on STIM1 oligomerization (lines, left graph), STIM clustering (dotted lines, middle graph) and overlay in ROI 1 (red) and ROI 2 (blue). (C) Schematic illustration of the kinetics of STIM1 oligomerization and redistribution upon ER depletion in both ROIs.

- [Supplemental Figure S2](#) -

**Fig. S2.** Determination of the effective correlation concentrations ( $\text{ECC}_{50}$ ) of STIM1. Oligomerization upon ER Ca<sup>2+</sup> depletion ( $\text{ECC}_{50/\text{oligomerization}}$ ) and of the disassembly of STIM1 oligomers upon ER Ca<sup>2+</sup> refilling ( $\text{ECC}_{50/\text{disassembly}}$ ). (A) Representative tracings of the effect of 100  $\mu\text{M}$  histamine and 15  $\mu\text{M}$  BHQ on Ca<sup>2+</sup><sub>ER</sub> (upper panel) and STIM1 oligomerization (lower panel), in the presence of 2 mM extracellular Ca<sup>2+</sup> followed by the removal of extracellular Ca<sup>2+</sup> (i.e. EGTA containing solution), and a subsequent re-addition of extracellular Ca<sup>2+</sup> in the absence of histamine and BHQ. (B) The correlation between ER Ca<sup>2+</sup> depletion and STIM1 oligomerization (continuous line, black circles,  $n=9$  for STIM1 oligomerization;  $n=10$  for Ca<sup>2+</sup><sub>ER</sub>) is compared with the correlation between ER Ca<sup>2+</sup> refilling and the disassembly of STIM1 oligomers (dotted line open squares,  $n=9$  for STIM1 oligomerization;  $n=10$  for Ca<sup>2+</sup><sub>ER</sub>). Ca<sup>2+</sup><sub>ER</sub> was recorded in single endothelial cells that transiently expressed D1<sub>ER</sub> and STIM1-YFP, respectively. STIM1 oligomerization was measured by following FRET between STIM1-CFP and STIM1-YFP. For STIM1 oligomerization, the ratios  $(F_{535}/F_{480})/F_0$  were normalized ( $\Delta_{\text{max}}=100\%$ ). Curves were fitted using Prism 4.0 for Mac (GraphPad Software, San Diego, CA).

- [Supplemental Figure S3](#) -

**Fig. S3.** Simultaneous recordings of the disassembly/reformation of STIM1 clusters (red traces) with Ca<sup>2+</sup><sub>cyto</sub> (black traces). Ca<sup>2+</sup><sub>cyto</sub> was recorded simultaneously with STIM1 dynamics in cells that transiently expressed YFP-STIM1 and loaded with fura-2-am. Images for subplasmalemmal STIM1 clustering were captured using an array confocal laser scanning microscope and for fura-2 measurements a conventional high-resolution imaging at the same device was used.

- [Movie 1](#) -

**Movie 1.** Histamine-induced degradation of basal STIM1 clusters. The cellular dynamics of STIM1-YFP is shown upon cell stimulation with the cytosolic-Ca<sup>2+</sup>-elevating agonist histamine (100  $\mu\text{M}$ ) in the presence of 2 mM extracellular Ca<sup>2+</sup>.

- [Movie 2](#) -

**Movie 2.** STIM1 clustering upon moderate and strong ER Ca<sup>2+</sup> depletion in the presence and absence of extracellular Ca<sup>2+</sup>. The cellular dynamics of STIM1-YFP is shown upon moderate ER Ca<sup>2+</sup> depletion using 100  $\mu\text{M}$  histamine in the presence of 2mM extracellular Ca<sup>2+</sup> followed by strong ER Ca<sup>2+</sup> depletion using the combination of 100  $\mu\text{M}$  histamine and 15  $\mu\text{M}$  BHQ first in the presence of 2mM extracellular Ca<sup>2+</sup> and subsequently in the absence of extracellular Ca<sup>2+</sup> (i.e. EGTA-containing solution).

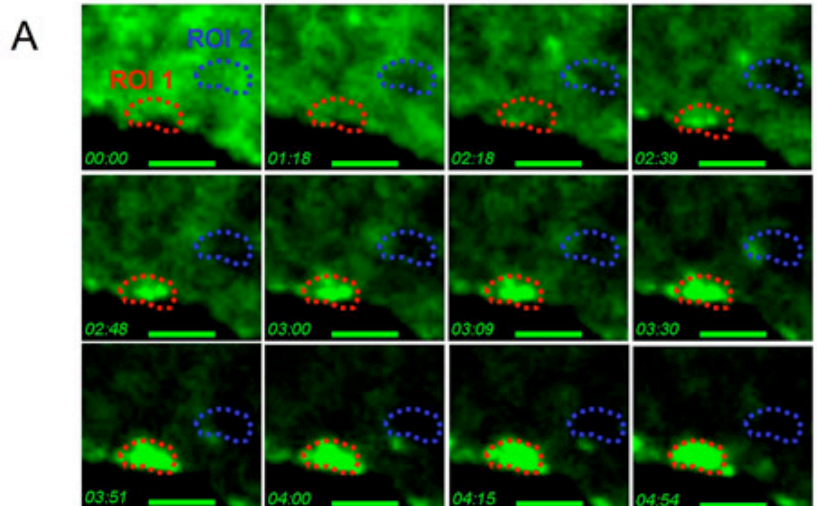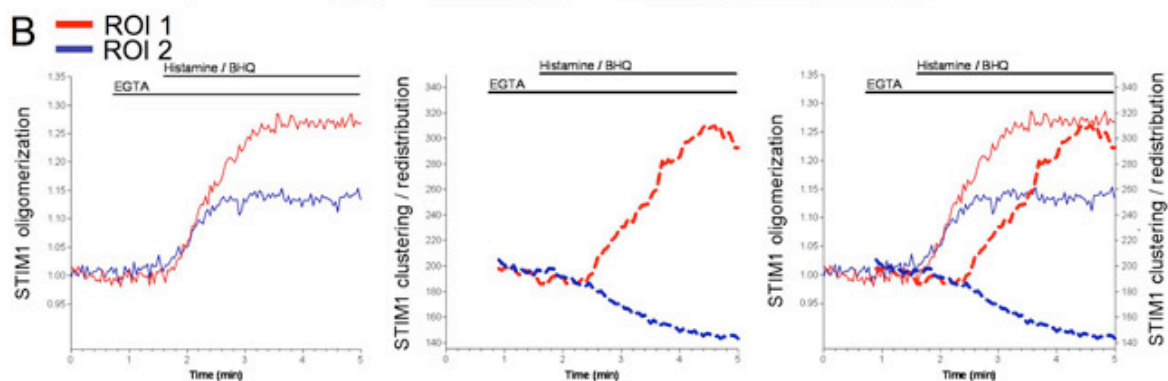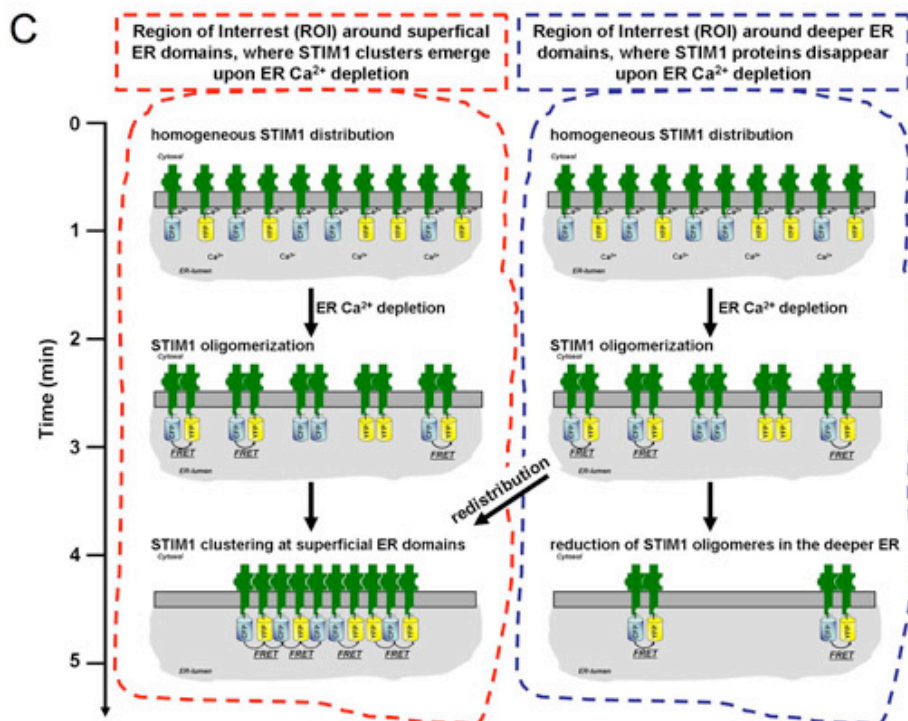

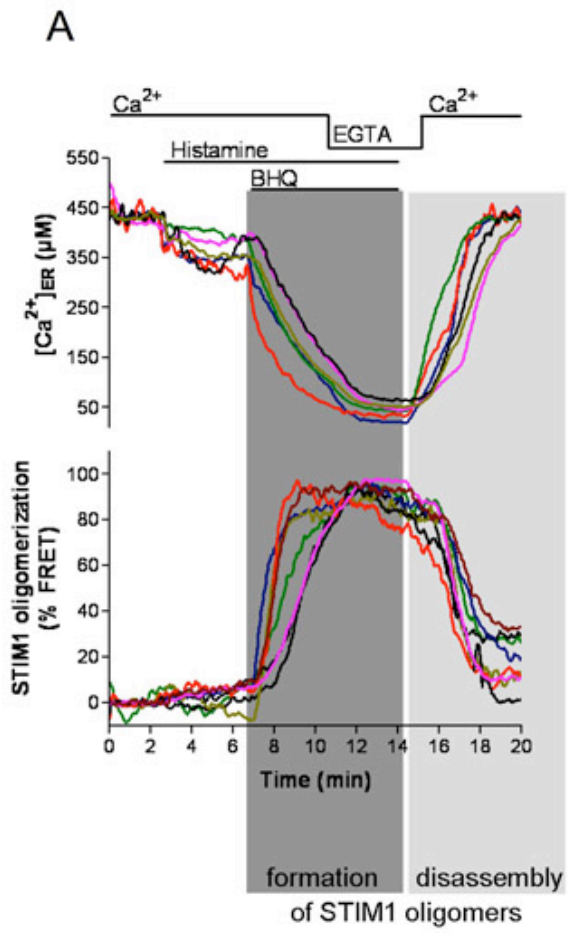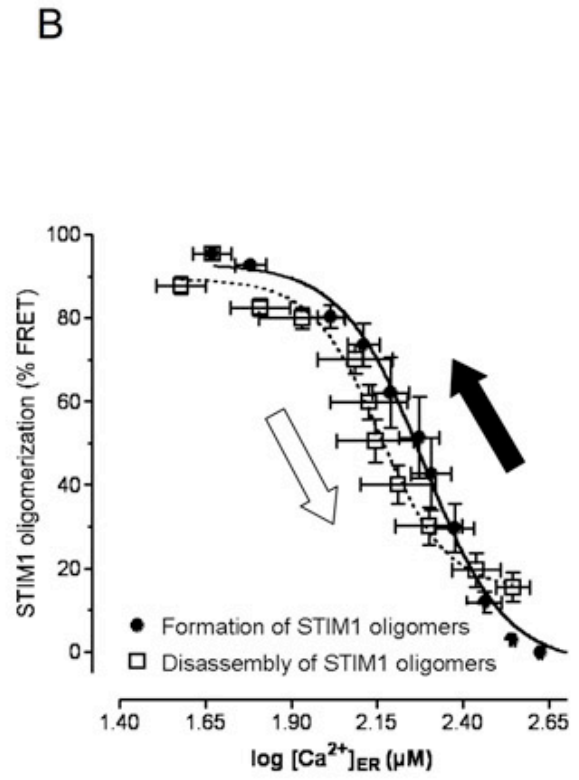

$[Ca^{2+}]_{cyto}$

YFP-STIM1-signal of a basal STIM1-cluster

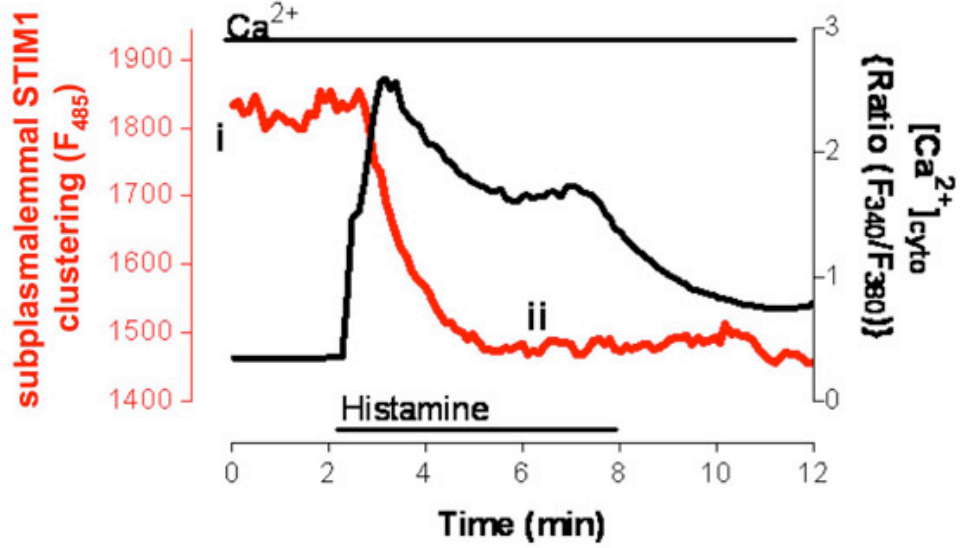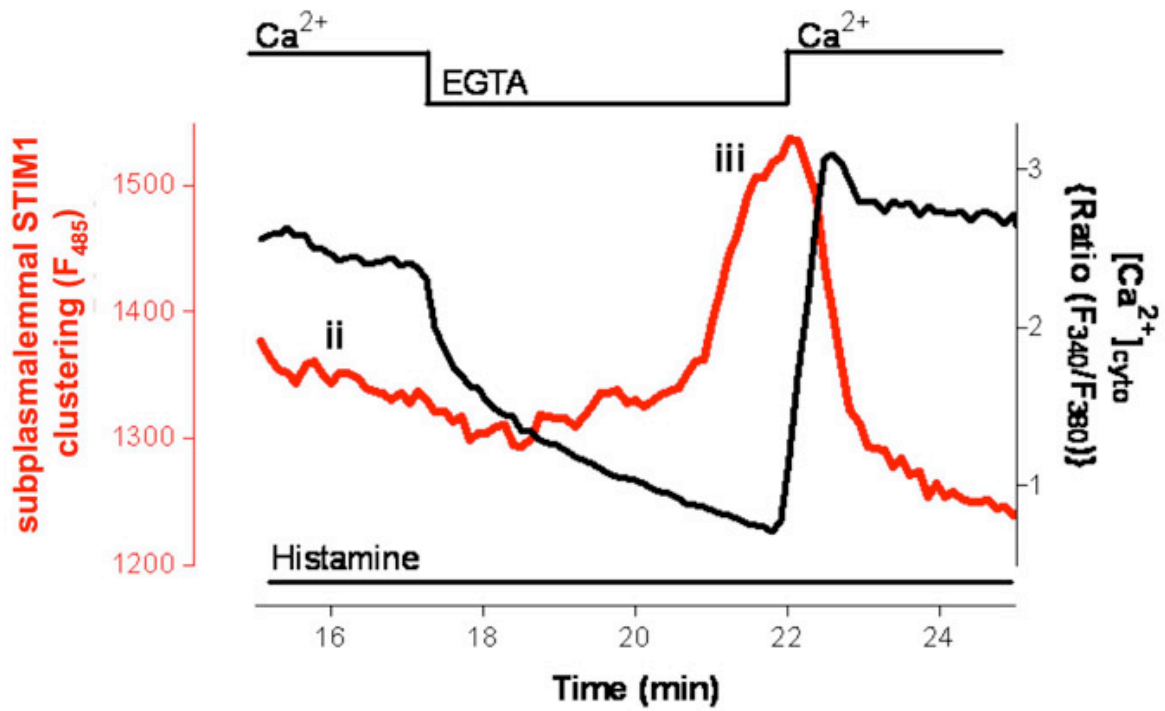

Supplement: NIHMS29865-supplement-Suppl_Tabs.pdf [file NIHMS29865-supplement-Suppl_Tabs.pdf]
